# Supplementary material
Source: MDPI journal article supplement (https://www.mdpi.com/2073-4344/12/8/872)
Supplement: s1 [file s1]

# Supporting information

## Synergistic Effect in Ag/Fe-MnO<sub>2</sub> Catalysts for Ethanol Oxidation

Ekaterina V. Kulchakovskaya <sup>1</sup>, Svyatoslav S. Dotsenko <sup>1</sup>, Leonarda F. Liotta <sup>2,\*</sup>, Valeria La Parola <sup>2</sup>, Sergey I. Galanov <sup>1</sup>, Olga I. Sidorova <sup>1</sup> and Olga V. Vodyankina <sup>1,\*</sup>

<sup>1</sup> Laboratory of Catalytic Research, Department of Chemistry, Tomsk State University, 634050 Tomsk, Russia; ekaterina.krv@gmail.com (E.V.K.); dotsenko\_tsk@mail.ru (S.S.D.); galanov@xf.tsu.ru (S.I.G.); sidorova@xf.tsu.ru (O.I.S.)

<sup>2</sup> Istituto per lo Studio dei Materiali Nanostrutturati (ISMN)-CNR, Via Ugo La Malfa 153, I-90146 Palermo, Italy; valeria.laparola@cnr.it

\* Correspondence: leonardafrancesca.liotta@cnr.it (L.F.L.); vodyankina\_o@mail.ru (O.V.V.)

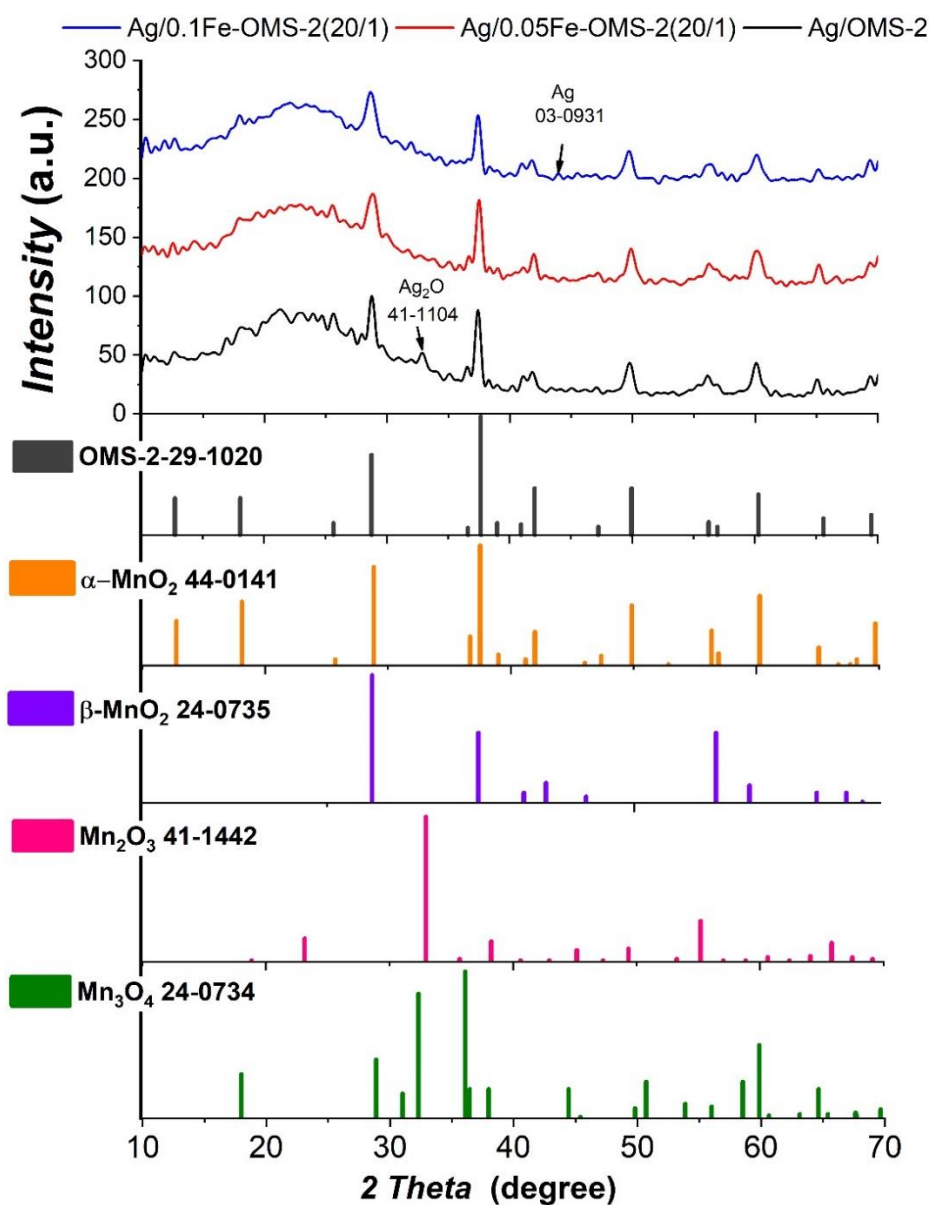

Figure S1. XRD patterns for prepared catalysts.

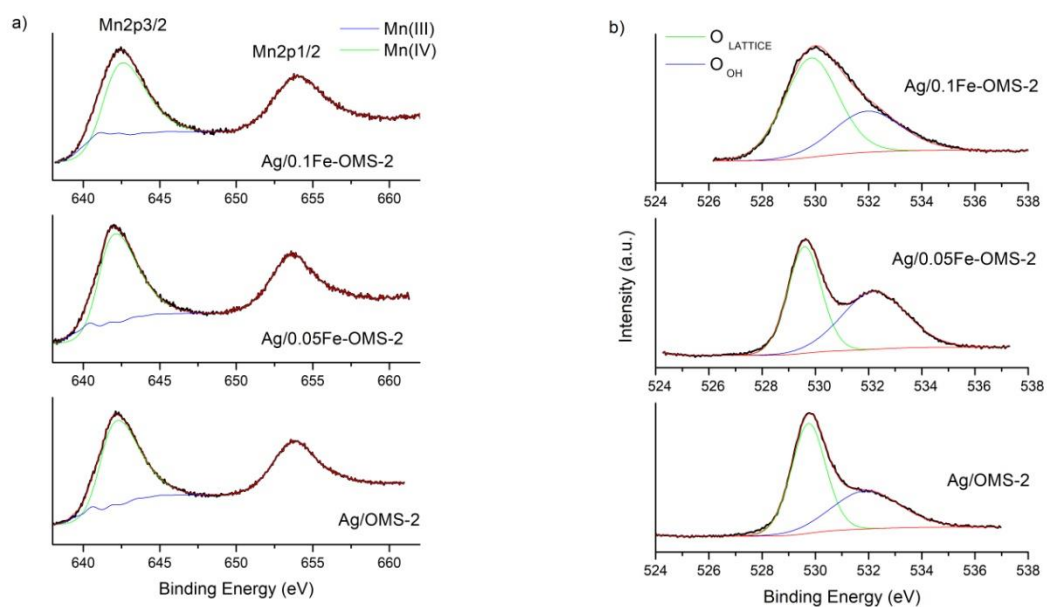

**Figure S2.** XPS regions a) Mn2p and b) O1s.

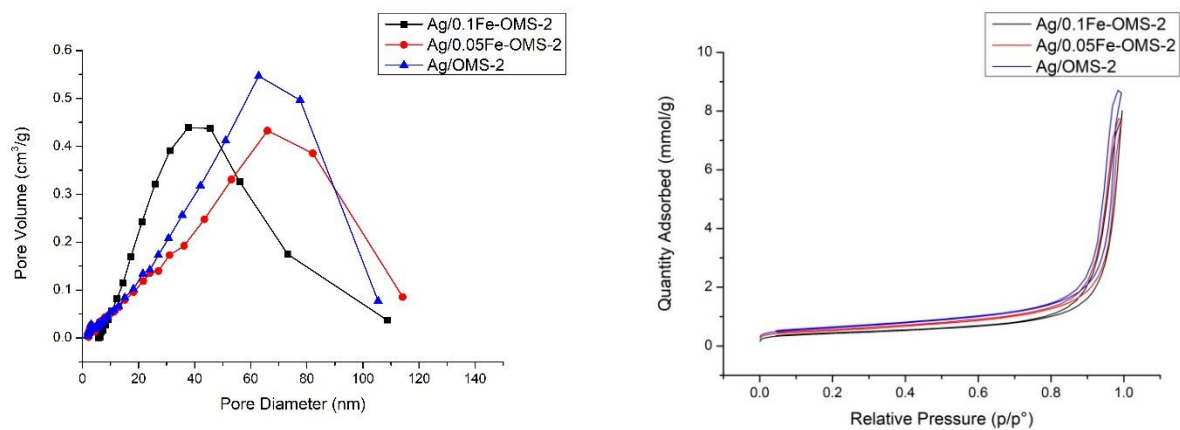

**Figure S3.** Texture characteristics for prepared samples.

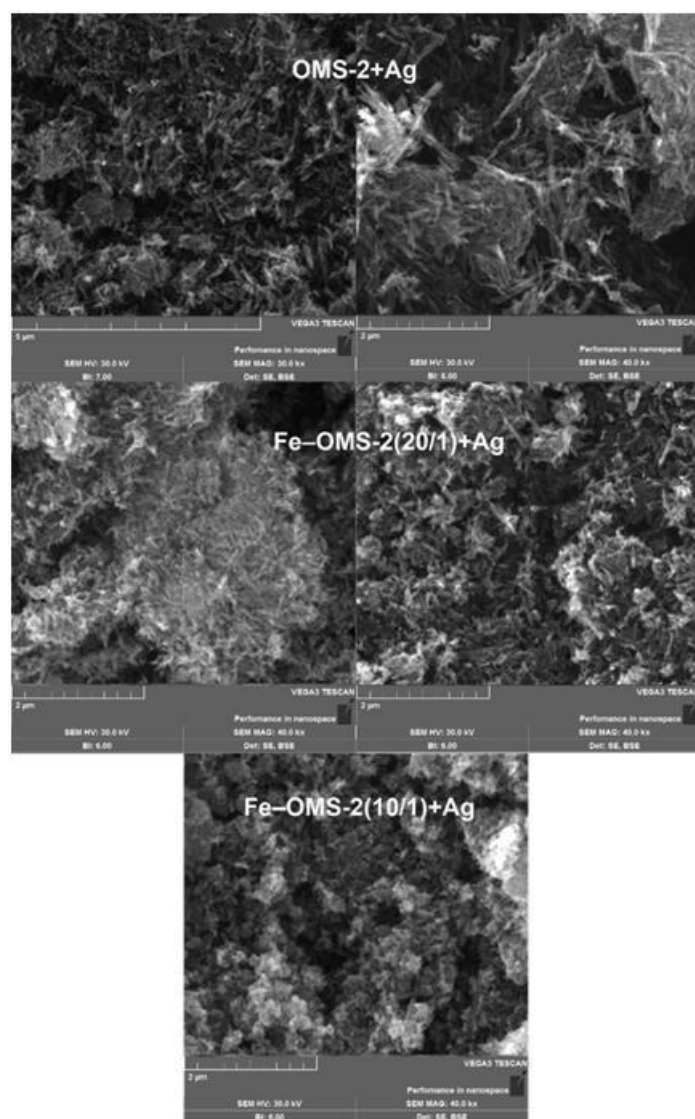

**Figure S4.** SEM images for investigated samples.

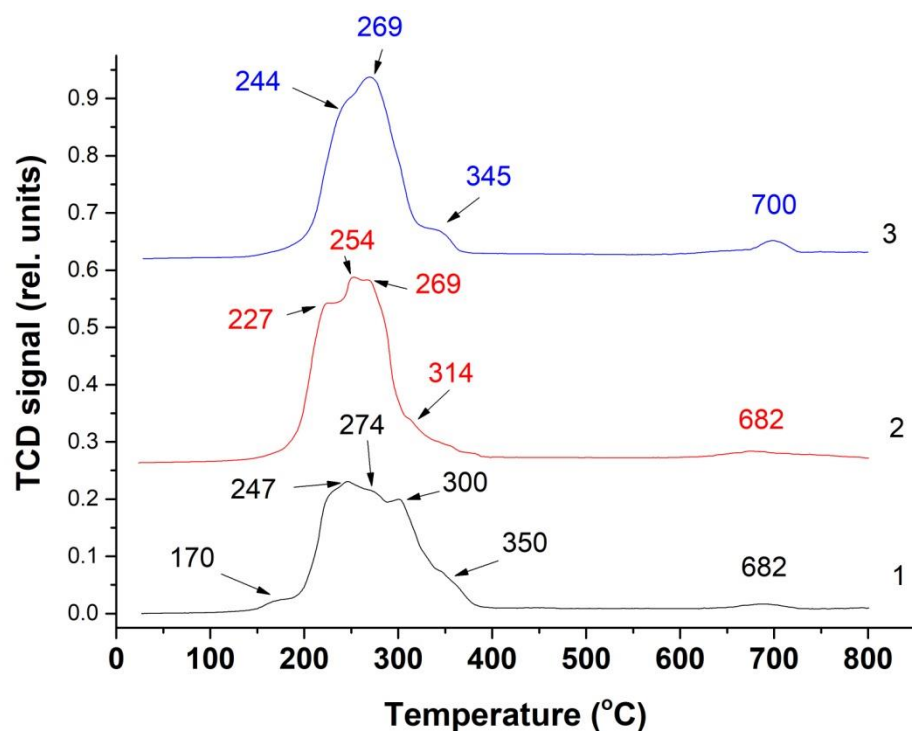

**Figure S5.** H<sub>2</sub>-TPR profiles for prepared samples:

1 — Ag/OMS-2, 2 — Ag/0.05Fe-OMS-2, 3 — Ag/0.1Fe-OMS-2

**Table S1.** H<sub>2</sub> consumption during H<sub>2</sub>-TPR experiments performed on the investigated catalysts before and after Ag introduction.

| Sample          | mmol-H <sub>2</sub> /g |
|-----------------|------------------------|
| Ag/OMS-2        | 0.042                  |
| Ag/0.05Fe-OMS-2 | 0.060                  |
| Ag/0.1Fe-OMS-2  | 0.038                  |

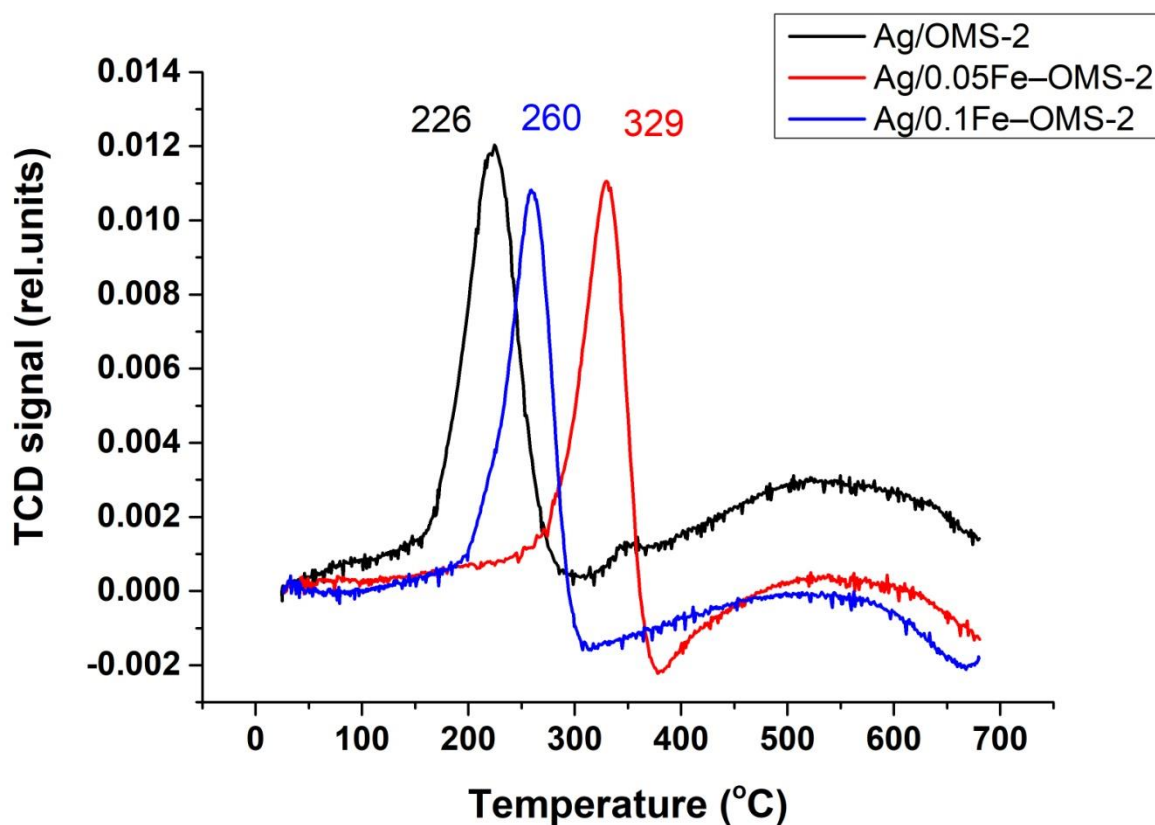

Figure S6. TPO profiles for prepared samples.

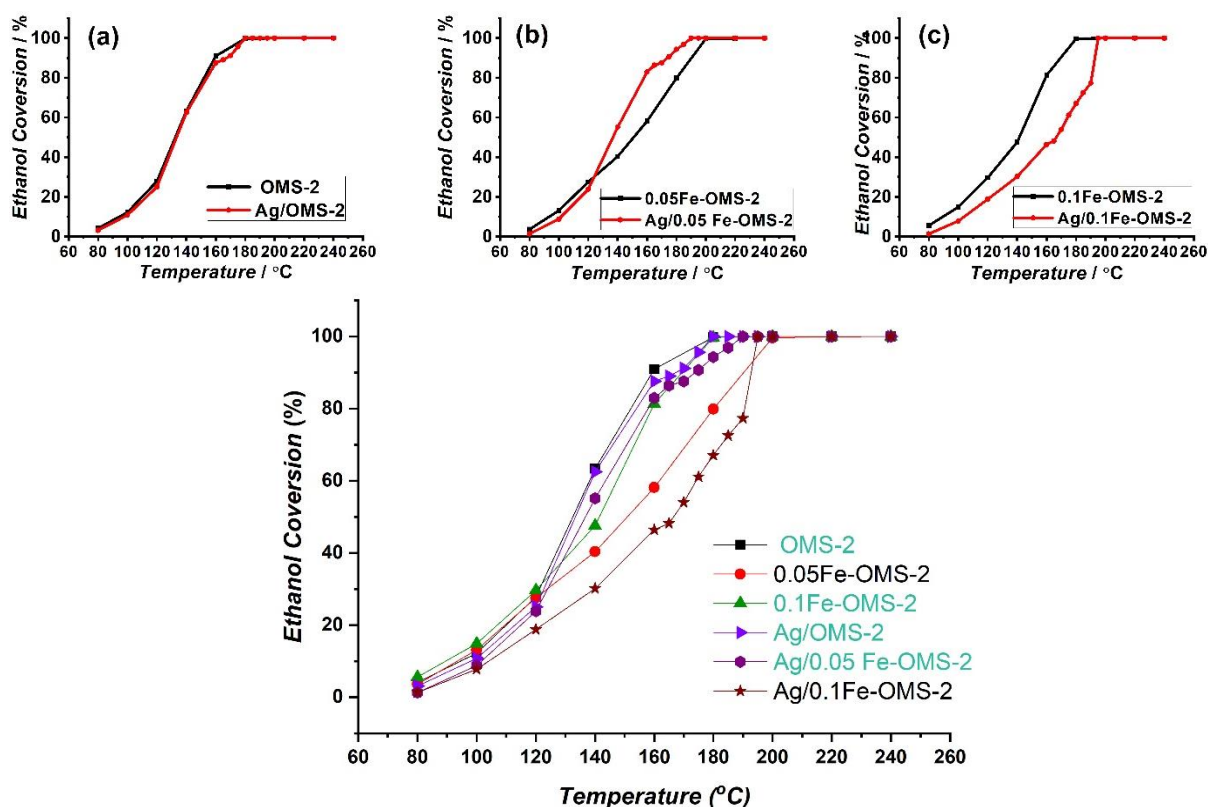

Figure S7. Light-off curves for catalysts with and without Ag [67]. Reaction conditions: GHSV = 7200 mL g<sup>-1</sup> h<sup>-1</sup>, Et/O<sub>2</sub> = 2/18.

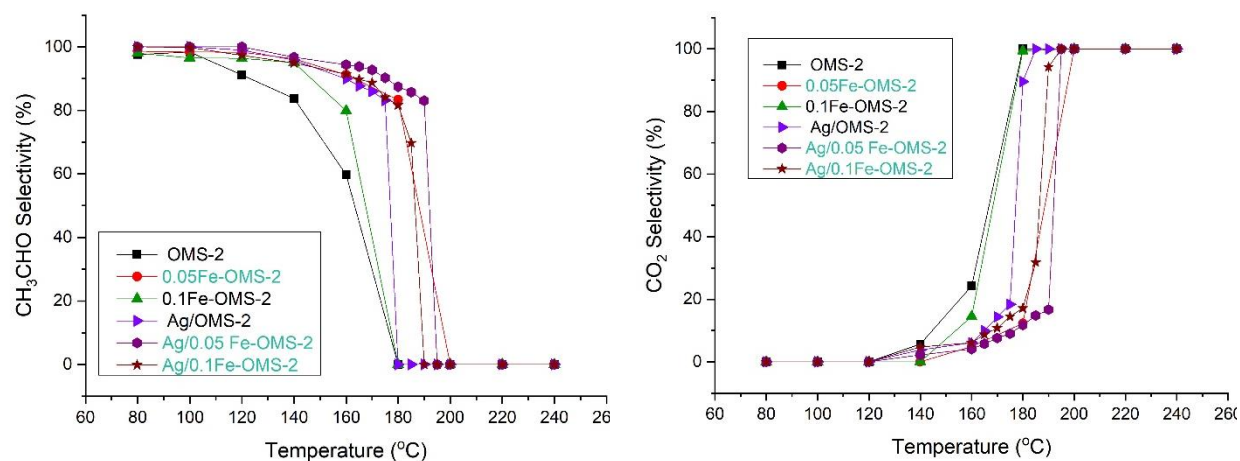

**Figure S8.** Temperature dependences of acetaldehyde and  $\text{CO}_2$  selectivities for catalysts with and without Ag [67]. Reaction conditions: GHSV =  $7200 \text{ mL g}^{-1} \text{ h}^{-1}$ , Et/ $\text{O}_2$  = 2/18.
